# Supplementary material for: Temporal Dynamics of Proactive and Reactive Motor Inhibition
Source: PubMed Central journal article supplement (PMC5406465; doi:10.3389/fnhum.2017.00204), 2017-04-27
Supplement: Image_1.pdf [file Image_1.pdf]

# Supplementary Material

## Temporal Dynamics of Proactive and Reactive Motor Inhibition

Matthias Liebrand, Inga Pein, Elinor Tzvi and Ulrike M. Krämer

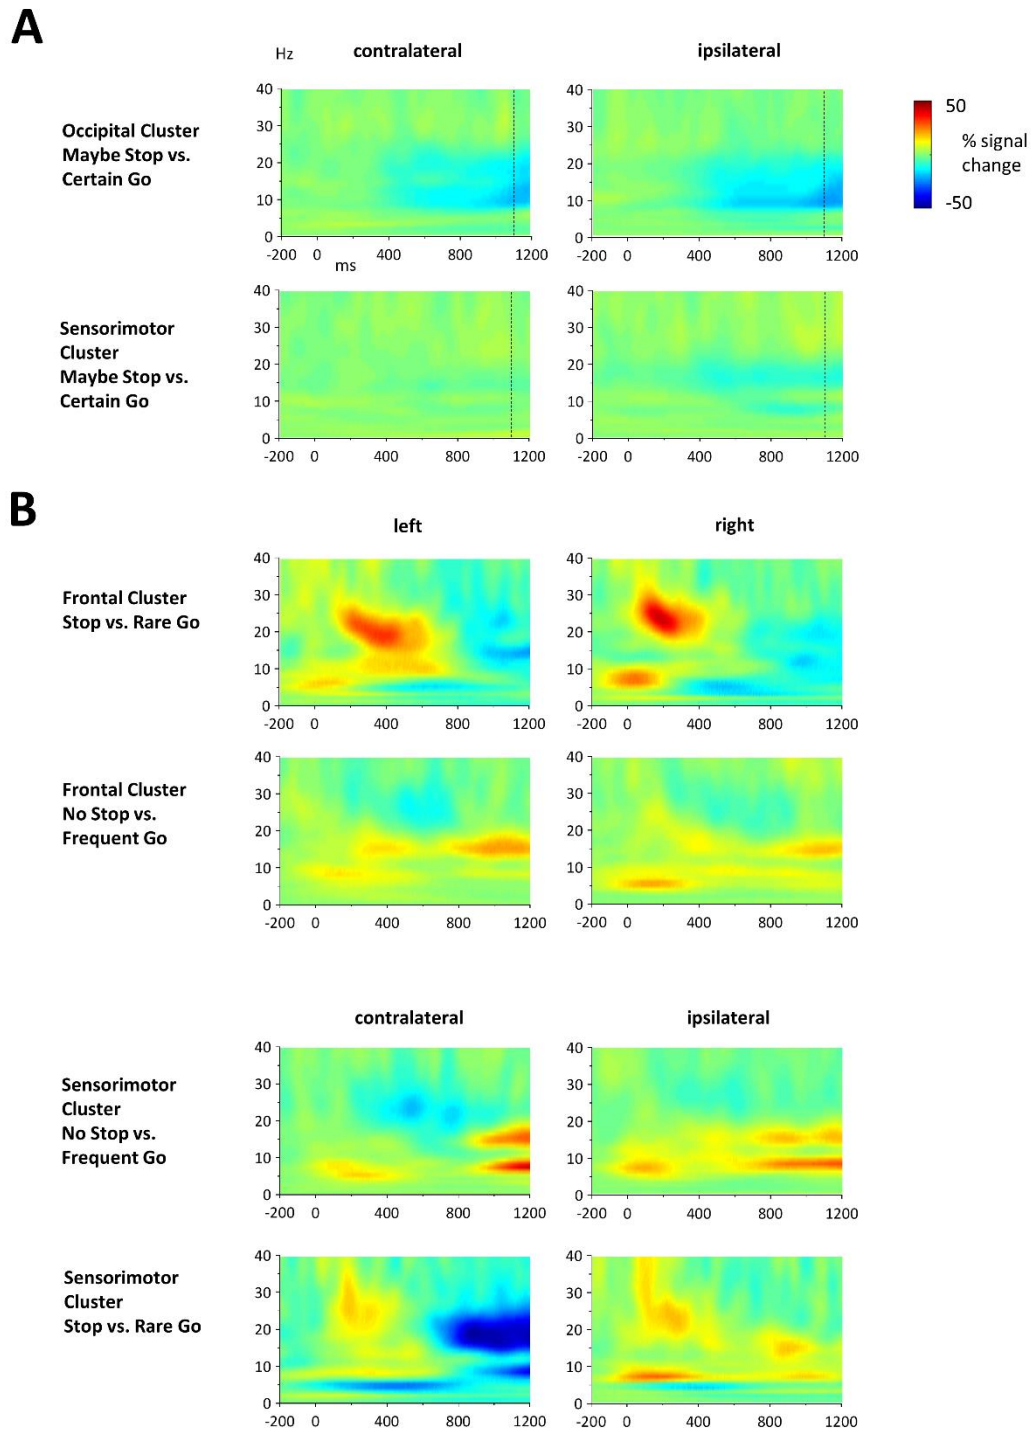

Supplementary Figure S1 | Time-frequency plots. In (A) data of the cue-target interval is displayed and in (B) target-related effects. Time-frequency plots are presented as differences between conditions at certain clusters (frontal/sensorimotor/occipital). In the cue-target interval at 1100 ms the target appeared. Note that data at sensorimotor clusters is flipped between hemispheres.

## SUPPLEMENTARY RESULTS

### Activity in the gamma band

As suggested by one reviewer, additionally to alpha/mu and beta power we investigated gamma activity (31-40 Hz). To examine gamma power the same clusters were used as for alpha/mu and beta activity. In the cue-target interval (700-1100 ms) there was no difference in frontal gamma between Maybe Stop- and Certain Go-trials ( $F_{1,21} = 1.9$ ,  $p = 0.178$ ). As target related effect (200-500 ms) frontal gamma did not differ between No Stop- and Frequent Go-trials ( $F_{1,21} = 3.0$ ,  $p = 0.1$ ). Frontal gamma tended (200-500 ms) to be increased in Stop- compared to Rare Go-trials ( $F_{1,21} = 4.2$ ,  $p = 0.053$ ). This latter finding supports our results obtained in the beta band.

Regarding gamma over occipital electrodes, in the cue-target interval (700-1100 ms) there was also no difference between Maybe Stop- and Certain Go-trials ( $F_{1,21} = 0.1$ ,  $p = 0.708$ ). As target related effects (200-500 ms) neither No Stop- and Frequent Go-trials ( $F_{1,21} = 2.9$ ,  $p = 0.102$ ) nor Stop- and Rare Go-trials ( $F_{1,21} = 1.8$ ,  $p = 0.190$ ) did show differences in occipital gamma.
